# Supplementary material for: Untargeted NMR Metabolomics Reveals Alternative Biomarkers and Pathways in Alkaptonuria
Source: MDPI journal article supplement (doi:10.3390/ijms232415805), 2022-12-13
Supplement: s1 [file s1]

## Untargeted NMR Metabolomics Reveals Alternative Biomarkers and Pathways in Alkaptonuria

### Supplementary material

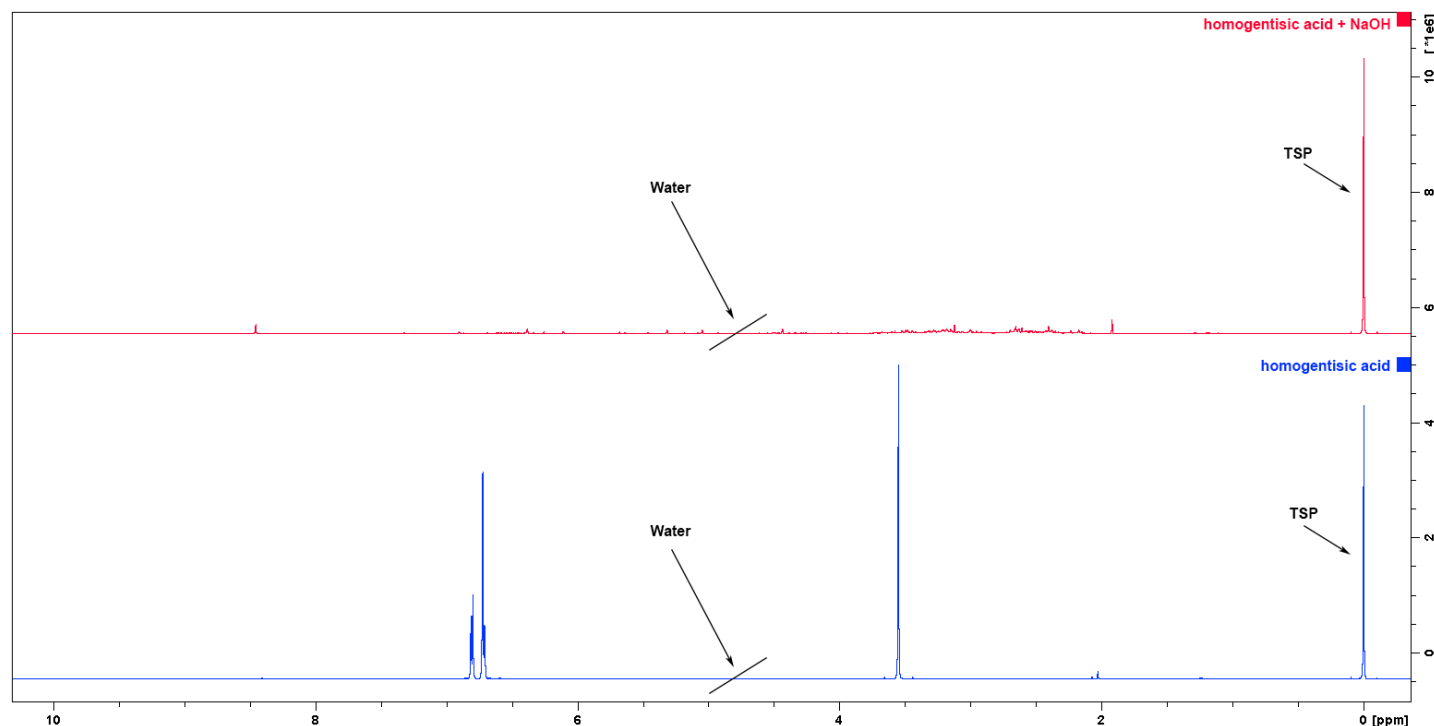

Figure S1. Proton 1D spectra of homogentisic acid (blue) (CH<sub>2</sub> singlet at 3.47 ppm and the aromatic system from hydrogens 3,6 and 4 at 6.70, 6.71 and 6.80 ppm) and of homogentisic acid added with 5 eq. of NaOH (red). In an alkaline environment, HGA signals disappear rapidly, and only residual signals arise from the reacted solution (see [19]).

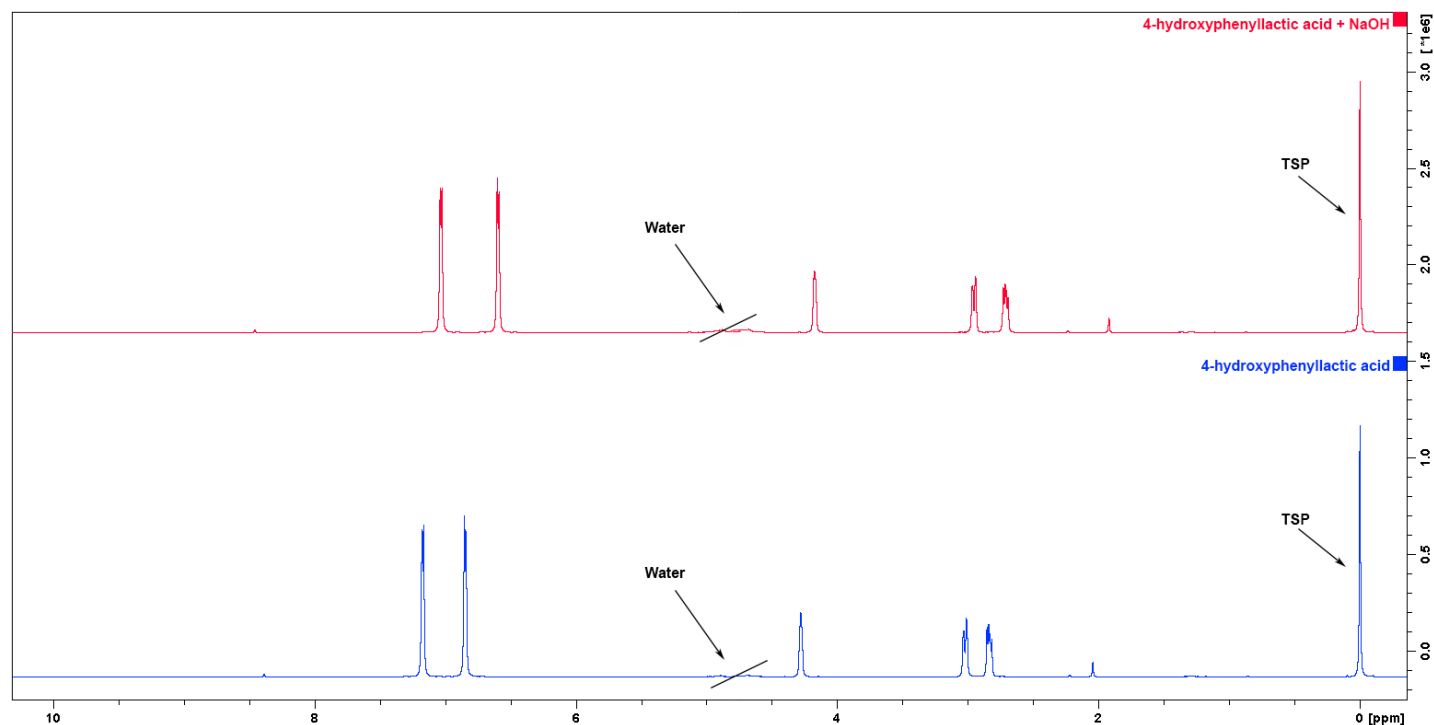

Figure S2. Proton 1D Spectra of 4-hydroxyphenyllactic acid (blue) (two clusters from the hydrogens of CH<sub>2</sub> at 2.84 ppm and 3.02 ppm, the CH quadruplet at 4.28 ppm and the aromatic system from hydrogens 3,5 and 2,6 at 6.85 and 7.17 ppm) and of 4-hydroxyphenyllactic acid added with 5 eq. of NaOH (red). Unlike HGA, no change occurs upon alalinization (except for the shift due to the pH increase), inferring no reaction takes place.

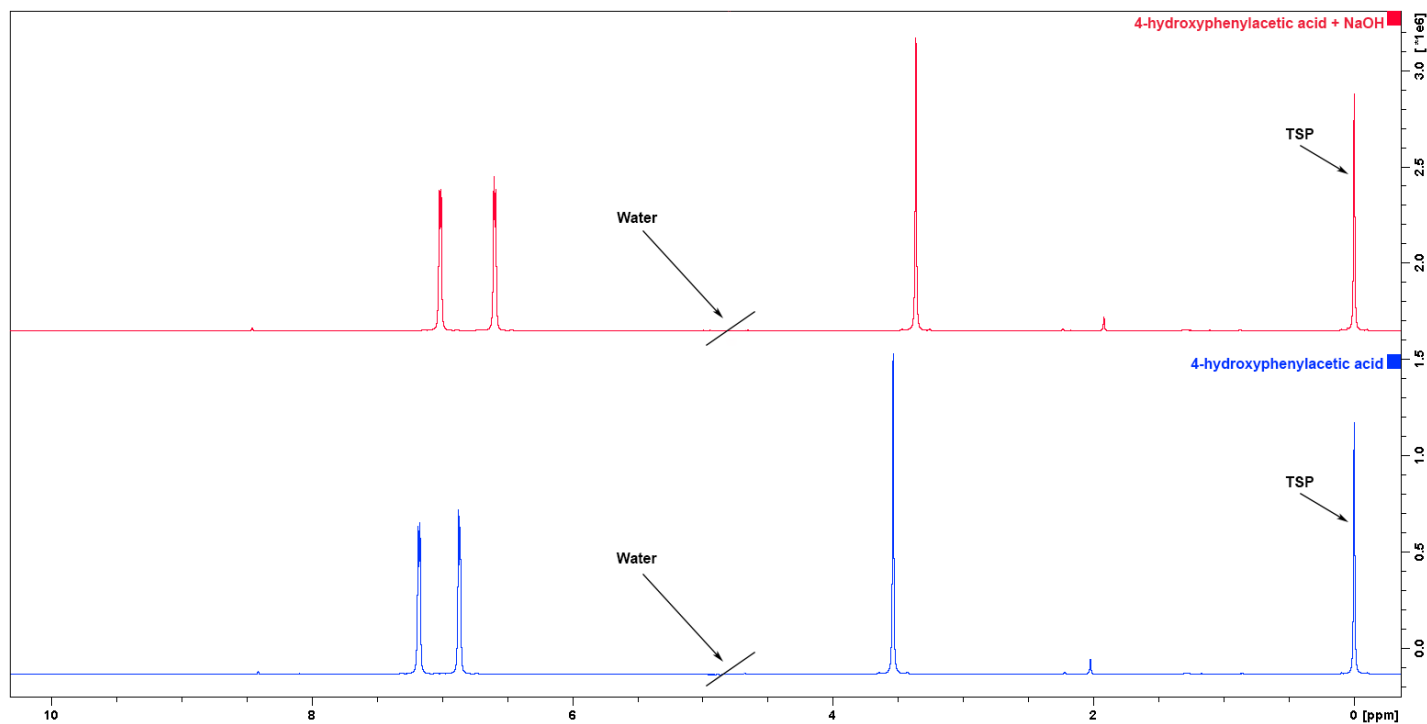

Figure S3. Proton 1D Spectra of 4-hydroxyphenylacetic acid (blue) ( $\text{CH}_2$  singlet at 3.54 ppm and the aromatic system from hydrogens 3,5 and 2,6 at 6.87 and 7.18 ppm) and of 4-hydroxyphenylacetic acid added with 5 eq. of NaOH (red). Unlike HGA, no change occurs upon alkalinization (except for the shift due to the pH increase), inferring no reaction takes place.

*Table S1. Metabolites identified by NMR analysis of urine samples with direction and significance of fold change for AKU concentrations vs. controls. HMDB codes are also reported. Seven compounds were excluded because they are drug metabolites, constituents of a drug administration vehicle, belong to microbial metabolism, or have unreliable quantification, such as urea.*

| Metabolite             | FC (AKU/CNTR)                   | HMDB Code |
|------------------------|---------------------------------|-----------|
| 1-Methylnicotinamide   | Not significant                 | HMDB00699 |
| 2-Aminoadipate         | Not significant                 | HMDB00510 |
| 2-Furoylglycine        | Increased                       | HMDB00439 |
| 2-Hydroxyisobutyrate   | Not significant                 | HMDB00729 |
| 3-Aminoisobutyrate     | Not significant                 | HMDB03911 |
| 3-Hydroxyisovalerate   | Increased                       | HMDB00754 |
| 3-Indoxylsulfate       | Not significant                 | HMDB00682 |
| 4-Hydroxybutyrate      | Excluded                        | HMDB00710 |
| 4-Hydroxyphenylacetate | Increased                       | HMDB00020 |
| 4-Hydroxyphenyllactate | Increased only under nitisinone | HMDB00755 |
| Acetate                | Not significant                 | HMDB00042 |
| Acetoacetate           | Not significant                 | HMDB00060 |
| Acetone                | Increased                       | HMDB01659 |
| cis-Aconitate          | Decreased                       | HMDB00072 |
| trans-Aconitate        | Increased                       | HMDB00958 |
| Alanine                | Not significant                 | HMDB00161 |
| Betaine                | Not significant                 | HMDB00043 |
| Carnitine              | Not significant                 | HMDB00062 |
| Choline                | Not significant                 | HMDB00097 |
| Citrate                | Not significant                 | HMDB00094 |
| Creatine               | Increased                       | HMDB00064 |
| Creatinine             | Not significant                 | HMDB00562 |
| Dimethylamine          | Not significant                 | HMDB00087 |
| Erythritol             | Not significant                 | HMDB02994 |
| Ethanol                | Excluded                        | HMDB00149 |
| Ethanolamine           | Not significant                 | HMDB00149 |
| Formate                | Increased                       | HMDB00142 |
| Galactarate            | Not significant                 | HMDB00639 |
| Glucose                | Excluded                        | HMDB00122 |
| Glutamine              | Not significant                 | HMDB00641 |
| Glycine                | Increased                       | HMDB00123 |
| Glycolate              | Not significant                 | HMDB00115 |
| Guanidinoacetate       | Increased                       | HMDB00128 |
| Hippurate              | Increased                       | HMDB00714 |
| Homogentisate          | Increased                       | HMDB00130 |
| Hypoxanthine           | Not significant                 | HMDB00157 |
| Myo-inositol           | Not significant                 | HMDB00211 |
| Isobutyrate            | Not significant                 | HMDB01873 |
| Isoleucine             | Not significant                 | HMDB00172 |
| Lactate                | Not significant                 | HMDB00190 |
| Mannitol               | Not significant                 | HMDB00765 |
| Methanol               | Excluded                        | HMDB01875 |
| Methylamine            | Not significant                 | HMDB00164 |
| N-phenylacetyl glycine | Not significant                 | HMDB00821 |
| O-acetylcarnitine      | Increased                       | HMDB00201 |
| Pyroglutamate          | Not significant                 | HMDB00267 |
| Salicylate             | Excluded                        | HMDB01895 |
| Succinate              | Not significant                 | HMDB00254 |
| Sucrose                | Not significant                 | HMDB00258 |
| Taurine                | Increased                       | HMDB00251 |
| Trigonelline           | Increased                       | HMDB00875 |

|                         |                                 |           |
|-------------------------|---------------------------------|-----------|
| Trimethylamine          | Not significant                 | HMDB00906 |
| Trimethylamine N-oxide  | Not significant                 | HMDB00925 |
| Tryptophan              | Increased                       | HMDB00929 |
| Tyramine                | Increased                       | HMDB00306 |
| Tyrosine                | Increased                       | HMDB00158 |
| Uracil                  | Excluded                        | HMDB00300 |
| Urea                    | Excluded                        | HMDB00294 |
| Valine                  | Not significant                 | HMDB00883 |
| Xylose                  | Not significant                 | HMDB00098 |
| 4-hydroxyphenylpyruvate | Increased only under nitisinone | HMDB00707 |

---
